1 **Compassionate use of recombinant human IL-7-hyFc as a salvage treatment for**  
2 **restoring lymphopenia in patients with recurrent glioblastoma**

3 *(Running title: Recombinant human IL-7-hyFc for Recurrent GBM)*

4  
5 Stephen Ahn, M.D.Ph.D.<sup>1</sup>, Jae-Sung Park, M.D.<sup>1</sup>, Heewon Kim<sup>2</sup>, Minkyu Heo<sup>2</sup>, Young Chul  
6 Sung<sup>2</sup>, Sin-Soo Jeun, M.D. Ph.D<sup>1</sup>

7 <sup>1</sup>*Department of Neurosurgery, Seoul St. Mary's Hospital, College of Medicine, The Catholic*  
8 *University of Korea, Seoul, South Korea*

9 <sup>2</sup>*Genexine, Inc., Seongnam-si, Gyeonggi-do, South Korea*

10  
11  
12  
13  
14  
15  
16  
17  
18  
19  
20  
21  
22  
23  
24  
25

**Address correspondence to:**

Sin-Soo Jeun, M.D. Ph.D.

Department of Neurosurgery, Seoul St. Mary's Hospital,

College of Medicine, The Catholic University of Korea

222 Banpodae-ro, Seocho-gu, Seoul, South Korea 06591

Tel.: +82-2-2258-7535, Fax: +82-2-2258-1853

E-mail: [ssjeun@catholic.ac.kr](mailto:ssjeun@catholic.ac.kr)

NOTE: This preprint reports new research that has not been certified by peer review and should not be used to guide clinical practice.

1 **Abstract**

2 **Purpose**

3 Lymphopenia is frequently observed and is associated with poor prognosis in  
4 glioblastoma (GBM) patients. Restoring lymphopenia in cancer patients has been suggested  
5 as a novel immunotherapeutic strategy. As interleukin-7 (IL-7) is necessary for proliferation  
6 of lymphocytes and to amplify the total lymphocyte count (TLC), IL-7 therapy has been tried  
7 for various cancers, although the results are inconclusive. Here, we describe the clinical  
8 results of recurrent GBM treated with long-acting engineered version of recombinant human  
9 IL-7 (rhIL-7-hyFc).

10 **Methods**

11 This prospective case series based on compassionate use was approved by the  
12 Ministry of Food and Drug Safety in South Korea. Patients with recurrent GBM were  
13 enrolled to Seoul St. Mary's Hospital. Primary outcomes were the safety profile and elevated  
14 total lymphocyte count (TLC). Secondary outcomes were overall survival (OS) and  
15 progression-free survival (PFS). The duration of median follow-up was 372.6 days (range  
16 98–864 days).

17 **Results**

18 Among 18 patients enrolled, 10 received rhIL-7-hyFc with temozolomide, 5 received  
19 rhIL-7-hyFc with bevacizumab, 1 received rhIL-7-hyFc with PCV chemotherapy, and 2  
20 received rhIL-7-hyFc alone. The mean TLC of enrolled patients after the first treatment with  
21 rhIL-7-hyFc was significantly increased from 1,131 cells/mm<sup>3</sup> (range 330-2,989) at baseline  
22 to 4,356 cells/mm<sup>3</sup> (range 661-22,661). Similar increase was observed in 16 of 18 patients  
23 (88.8%), only after the first treatment of rhIL-7-hyFc. TLCs of these patients were  
24 maintained higher while rhIL-7-hyFc was repeatedly administered. Most common adverse  
25 events were injection sites reactions (64.7%) including urticaria and itching sensation,

1 however, there were no serious adverse events more than grade III. Median OS and PFS were  
2 378 days (range 107-864 days) and 231 days (55-726 days), respectively.

### 3 **Conclusion**

4 Our study first reports that IL-7 immunotherapy can restore lymphopenia and  
5 maintain TLC with various salvageable chemotherapies in recurrent GBM patients without  
6 serious adverse toxicities. This outcome warrants further larger and randomized clinical trials  
7 to validate the clinical benefits of rhIL-7-hyFc for GBM patients.

8

### 9 **Keywords**

10 glioblastoma; recurrence; lymphopenia; rhIL-7-hyFc; immunotherapy

## 1 Introduction

2 Glioblastoma is the most common and devastating brain malignancy in adults <sup>1</sup>.  
3 Median overall survival (OS) is less than 2 years despite aggressive multimodal standard of  
4 care including maximal safe resection and concomitant chemoradiation (CCRT) followed by  
5 adjuvant chemotherapy with temozolomide <sup>2</sup>. Tumor recurrence and progression occur in  
6 almost all GBM patients, in whom available treatment options will be re-surgical resection;  
7 re-irradiation; and chemotherapies such as temozolomide, bevacizumab, and PCV  
8 [procarbazine, lomustine (CCNU), and vincristine]. However, the clinical benefit is  
9 unsatisfactory <sup>3 4</sup>.

10 Lymphopenia, defined as decreased counts of circulating lymphocytes resulting from  
11 mainly radiotherapy, is frequently observed in GBM patients and is recently established as a  
12 novel biomarker associated with poor clinical outcomes <sup>5 6 7 8 9</sup>. Furthermore, restoring  
13 lymphopenia is a novel therapeutic approach in various cancers including GBM <sup>10 11</sup>.  
14 Interleukin-7 (IL-7), which is one of the common gamma-chain cytokines with IL-2 and IL-  
15 15 and has critical roles in maintaining lymphocyte homeostasis, is suggested to restore  
16 lymphopenia and improve clinical outcomes of cancer patients <sup>12 13</sup>. In this background, IL-7  
17 cytokine therapy was tested to treat recurrent or refractory cancer patients in clinical studies,  
18 but showed unclear efficacy of T cell regeneration and clinical benefits <sup>14,15, 16, 17</sup>.

19 In our compassionate use program, our study investigated clinical benefits from the  
20 treatment of hybrid-Fc fused recombinant human IL-7 (rhIL-7-hyFc) in recurrent GBM  
21 patients. We evaluated whether rhIL-7-hyFc therapy could restore lymphopenia and increase  
22 total lymphocyte count (TLC) with salvageable chemotherapies for GBM patients. In  
23 addition, we evaluated the safety profiles and survival outcomes of enrolled patients.

## 1 **Patients and Methods**

### 2 **Ethical consideration**

3 Patients with recurrent GBM received rhIL-7-hyFc on compassionate use basis,  
4 approved and supervised by the Ministry of Food and Drug Safety in South Korea. The study  
5 was conducted according to the Declaration of Helsinki and was approved by the institutional  
6 review board in Seoul St. Mary's Hospital. It was registered in the National Institutes of  
7 Health Clinical Trial Registry (NCT04289155). All patients signed on informed consent  
8 forms prior to compassionate use of rhIL-7-hyFc.

### 9 **Study population**

10 Patients who were pathologically confirmed with recurrent GBM between March  
11 2018 and December 2019 at Seoul St. Mary's Hospital were screened. Treatment with rhIL7-  
12 hyFc was offered for patients older than 18 years with pathologically confirmed recurrent  
13 GBM. Patients who had acute infection, autoimmune or hematologic disease at the time of  
14 recurrence were excluded.

### 15 **Clinical variables**

16 Baseline characteristics of sex, date of birth, dates of surgeries, pathological findings,  
17 prior treatments, and radiological findings were collected and summarized. Pathological  
18 evaluation was performed by a neuropathologist following the 2016 WHO classification of  
19 the central nervous system. Isocitrate dehydrogenase (IDH)1 or IDH2 mutation was assessed  
20 by Sanger sequencing. Co-deletion of 1p19q was identified by fluorescent in situ  
21 hybridization. [6]-Methylguanine-DNA methyltransferase (MGMT) gene methylation and  
22 TERT promoter mutation status were evaluated by polymerase chain reaction (PCR). Loss of  
23 ATRX was assessed using immunohistochemistry. Radiographic responses on magnetic  
24 resonance imaging (MRI) were determined by two neuro-radiologists according to

1 Immunotherapy Response Assessment in Neuro-Oncology (iRANO) criteria. The duration of  
2 recurrence was defined as days from initial surgery to date of MRI showing recurrence.

### 3 **Treatment protocols of rhIL-7-hyFc therapy**

4 rhIL-7-hyFc was prepared and provided by Genexine, Inc. and detailed information  
5 for rhIL-7-hyFc was previously reported<sup>18</sup>. In brief, rhIL-7-hyFc is a recombinant human IL-  
6 7 fused to the hybridizing IgD/IgG4 immunoglobulin domain to increase half-life of IL-7 *in*  
7 *vivo*. rhIL-7-hyFc was administered intramuscularly into the gluteus muscle and/or deltoid  
8 muscle every 4 to 8 weeks. Patients were treated at various dose ranging from 60 µg/kg to  
9 1,440 µg/kg while being monitored for toxicity.

10 Patients received salvageable systemic therapy with rhIL-7-hyFc treatment, if  
11 satisfied with criteria. Systemic therapy regimen was determined by a treating clinician.  
12 Temozolomide was used for most recurrent cases occurring > 6 months upon completion of  
13 standard of care. Bevacizumab and chemotherapy with procarbazine, lomustine and  
14 vincristine (PCV) were allowed depending on clinician's assessment. Dosing schedule of  
15 rhIL-7-hyFc was determined in consideration of both the lympho-depletion effect of  
16 cytotoxic chemotherapies and the recovery time of lymphocyte counts induced by rhIL-7-  
17 hyFc. In combination treatment with temozolomide, patients were given rhIL-7-hyFc one  
18 week after initiation of temozolomide. In combination treatment with bevacizumab, the  
19 patients were given rhIL-7-hyFc within 3 days of bevacizumab. In combination therapy with  
20 PCV chemotherapy, rhIL-7-hyFc was administered one week after completion of PCV.

### 21 **Primary and secondary endpoints**

22 Primary endpoints were safety events and restoration of total lymphocyte count.  
23 Treatment-associated toxicity was evaluated at every visit using Common Terminology  
24 Criteria for Adverse Events (CTCAE) version 5.0. Complete blood count including white  
25 blood cells and composition of neutrophils and lymphocytes were calculated at the time of

1 blood sampling on the day of chemotherapy, day of administration of rhIL-7-hyFc, and 3  
2 weeks after initial administration of rhIL-7-hyFc. Secondary endpoints were overall survival  
3 (OS) and progression-free survival (PFS) after recurrence. OS was also defined as days from  
4 the date of MRI showing recurrence before use of rhIL-7-hyFc to date of death. Patients alive  
5 on February 28, 2021, were censored. The mean duration of follow-up was 372.6 days (range  
6 98–864). To compare the OS of enrolled patients with historical patients; 123 patients with  
7 recurrent GBM diagnosed and treated in this hospital between 2014 and 2017 were enrolled  
8 into the historical cohort. The detailed characteristics of the historical cohort are described in  
9 Supplementary Table 1. These patients were followed by routine magnetic resonance  
10 imaging (MRI) every 8 or 12 weeks if they do not exhibit neurologic symptoms.

#### 11 **Statistical analysis**

12 Continuous clinical variables such as TLC are expressed as mean value  $\pm$  standard  
13 deviation. Swimmer plot and all figures were constructed using GraphPad Prism software  
14 (Version 8.4.3). Kaplan–Meier survival was used to estimate median OS and PFS. Log-rank  
15 test was used to compare OS between the treatment group and historical control. Statistical  
16 analysis was estimated using R Statistical Software (Version 4.0.5).

## 1 **Results**

### 2 **Characteristics and clinical follow-up of patients treated with rhIL-7-hyFc**

3 A total of 18 patients with pathologically confirmed recurrent GBM were included in  
4 the study. Clinical characteristics of sex; age; pathological findings; the presence of  
5 leptomeningeal spread at enrollment; and history of treatment including surgery,  
6 chemotherapy, and radiotherapy before enrollment are described in Table 1. Of 18 patients,  
7 10 started rhIL-7-hyFc treatment with combination of temozolomide chemotherapy (2  
8 patients switched to bevacizumab after progression), 5 received it with combination of  
9 bevacizumab with or without irinotecan, 1 received it with PCV chemotherapy, and 2  
10 received rhIL-7 treatment alone. Of these, 72% of patients (13 of 18) received rhIL-7-hyFc at  
11 least twice, while 28% of patients (5 of 18) received it only one time. The initial dose was 60  
12  $\mu\text{g}/\text{kg}$  and increased to 1,440  $\mu\text{g}/\text{kg}$ . Detailed information on rhIL-7-hyFc injection with  
13 systemic therapy is described in Table 2, and clinical follow-up of the patients is illustrated in  
14 Figure 1.

### 15 **TLC changes following treatment with rhIL-7-hyFc**

16 The mean TLC of these patients before treatment with rhIL-7-hyFc was 1,131 (range  
17 330-2,989) cells/ $\text{mm}^3$ . After initial treatment with rhIL-7-hyFc, mean TLC increased to 4,356  
18 (range 661-22,661) cells/ $\text{mm}^3$ ; a mean 3.40 (range 1.38-9.13)-fold increase. Increased TLC  
19 was noted in 16 of 18 patients (94.4%) after the first treatment with rhIL-7-hyFc and it was  
20 maintained following repeated treatment; only one patient (GBM 17) did not respond to rhIL-  
21 7-hyFc. Changes of TLC in all enrolled patients following injection of rhIL-7-hyFc are  
22 described in Supplementary Table 2. The dose of rhIL-7-hyFc was categorized as low (60-  
23 240  $\mu\text{g}/\text{kg}$ ), medium (480-720  $\mu\text{g}/\text{kg}$ ), and high (960-1,440  $\mu\text{g}/\text{kg}$ ); TLC significantly  
24 increased in a dose-dependent manner for all patients but one patient (GBM17), as presented  
25 in Figure 2.



## 1 **Safety profile and survival outcomes**

2 Most common adverse events related to rhIL-7-hyFc were injection site reactions  
3 including urticaria, redness, and/or itching sensation at near injection sites (64.7%). Of these  
4 patients, only one showed grade 3 urticaria and itching sensation. Other serious adverse  
5 events (grade 3-4) observed include edema near injection site (13.2%), fatigue (2.9%), and  
6 febrile sensation (2.9%) (Table 3).

7 Median OS and PFS of enrolled patients after recurrence were 378 days (range 107-  
8 864 days) and 231 days (55-726 days), respectively (Figure 3). We also compared the median  
9 OS of enrolled patients (treatment group) with that of historical patients with recurrent GBM  
10 (historical group) treated in our institution. Median OS of the treatment 18 patients after  
11 recurrence was significantly longer than that of 123 patients in the historical cohort (378  
12 days, range 107-864 versus 169 days, range 33-1,067,  $p = 0.003$ ) (Figure 3.)

13 Of 18 total patients in treatment group, 15 (83.3%) survived more than 6 months and  
14 9 (50.0%) survived more than 1 year after treatment with rhIL-7-hyFc. In addition, 9 patients  
15 (50.0%) had stable disease for more than 6 months after co-treatment with rhIL-7-hyFc  
16 injection and systemic therapy. Among them, 2 patients (GBM6 & 11) co-treated with  
17 bevacizumab had partial response, and one patient (GBM9) co-treated with temozolomide  
18 had stable disease for more than 2 years after treatment with rhIL-7-hyFc injection.  
19 Representative radiographic findings from these patients are illustrated in Figure 4.

## 20 **Discussion**

21 We demonstrated that rhIL-7-hyFc can be safely added to conventional salvageable  
22 systemic therapy such as temozolomide, bevacizumab, and PCV chemotherapy. There are  
23 concerns whether rhIL-7-hyFc can restore lymphocyte count when used in combination with  
24 cytotoxic chemotherapy, but our study showed that TLCs of patients who received co-  
25 treatment of rhIL-7-hyFc with chemotherapy were dramatically increased from 1,131 (range

1 330-2,989) cells/mm<sup>3</sup> at baseline to 4,356 (range 661-22,661) cells/mm<sup>3</sup> after the first  
2 treatment, a mean 3.40-fold increase (range 1.38-9.13). The increase in TLCs was dose-  
3 dependent. In addition, continuing rhIL-7-hyFc therapy facilitated recovery of lymphopenia  
4 induced by concurrent chemotherapy and maintained TLCs throughout the treatment higher  
5 than the baseline. Mean OS after recurrence of rhIL-7-hyFc treated patients exceeded 1 year  
6 (378 days); with 2 patients showing partial response and one patient showing stable disease  
7 for more than 2 years. Because of the small number of patients (n=18) and the potential  
8 impact of salvageable systemic therapy, it is premature to draw any conclusion, therefore a  
9 larger, randomized controlled trial is needed to validate the result. However, our study  
10 highlights that rhIL-7-hyFc cytokine therapy effectively and safely restored lymphocyte  
11 count and ongoing treatment sustained elevated levels of TLC in spite of concurrent systemic  
12 therapy with temozolomide, bevacizumab, or PCV chemotherapy in recurrent GBM patients.

13 Ample evidence suggests that lymphopenia is one of the poorest prognostic factors in  
14 various cancer types including GBM<sup>5-8,10</sup>. The standard care of GBM includes aggressive  
15 concurrent chemoradiation followed by chemotherapy using temozolomide, which causes  
16 severe and prolonged lymphopenia in most GBM patients<sup>11,19</sup>. In this context, preventing or  
17 restoring lymphopenia has been suggested as a novel immunotherapeutic strategy<sup>5,9,10</sup>. IL-7,  
18 first discovered in the 1980s, is one of the critical cytokines to elicit T-cell responses to target  
19 cancer cells<sup>13</sup>. It promotes lymphocyte development in the thymus and maintains the  
20 homeostasis of naive and memory T cells in the periphery<sup>20,21</sup>. Furthermore, IL-7 can repair  
21 T cell injury in cancer patients and overcome immunosuppressive tumor microenvironment  
22<sup>11,22</sup>. Several preclinical studies have demonstrated the efficacy of IL-7 in various cancer  
23 types with or without combined therapeutic agents<sup>23-25</sup>.

24 Rosenberg et al. first reported that IL-7 cytokine therapy administered every 3 days  
25 for 8 sessions could increase CD4+ and CD8+ T cells in cancer patients<sup>15</sup>. In another clinical

1 trial, recombinant human IL-7 injection every other day for 2 weeks for refractory cancer  
2 patients increased CD3+, CD4+, and CD8+ lymphocytes in a dose-dependent manner<sup>16</sup>. In  
3 another randomized placebo-controlled phase IIa clinical study, patients with metastatic  
4 breast cancer who received 3 injections of recombinant IL-7 for 3 weeks had increased CD4  
5 T cell count compared to patients who received placebo<sup>14</sup>. Lastly, a recent clinical trial using  
6 rh-IL-7 as adjuvant therapy every 2 weeks combined with dendritic cell vaccination or  
7 autologous lymphocyte infusion showed significantly better OS in pediatric sarcoma patients  
8 compared to that of patients in a historical control cohort<sup>17</sup>. Compared to previous clinical  
9 studies multiple administered short-acting IL-7, our study showed that rhIL-7-hyFc could  
10 increase TLC drastically even after a single injection. In addition, we demonstrated that rhIL-  
11 7-hyFc therapy could be combined with conventional systemic therapy such as  
12 temozolomide, bevacizumab, or PCV chemotherapy. Even for patients receiving lympho-  
13 depleting cytotoxic chemotherapy, TLC increased after rhIL-7-hyFc injection. Therefore,  
14 combination of rhIL-7-hyFc with conventional systemic therapy such as temozolomide,  
15 bevacizumab, or PCV chemotherapy can provide an opportunity for clinical benefit to the  
16 patients. To the best of our knowledge, our study is the first to report the clinical experience  
17 of rhIL-7-hyFC therapy in GBM patients. Our preliminary clinical findings will facilitate the  
18 development as a novel combination immunotherapy strategy for various cancers including  
19 GBM. Considering that lymphopenia is usually a result of concurrent chemoradiation, IL-7  
20 administered during or after concurrent chemoradiation might be an alternative to restore or  
21 prevent lymphopenia. In addition, increasing lymphocyte counts can augment anti-tumor  
22 effect of immune checkpoint inhibitors for the typical immunotherapy non-responsive  
23 GBM.<sup>10,26</sup>

24 Our study had several limitations. First, the selection bias is imposed on the study as  
25 compassionate use is designed without strict conditions of enrollment. Second, the various

1 time interval between the time of recurrence and the first injection of rhIL-7-hyFc could  
2 complicate the interpretation of the study. Third, a few patients who recurred from primary  
3 high-grade glioma were included, although all patients had pathologically confirmed GBM.  
4 Last, our study did not include changes in immune subsets including various T cell  
5 populations such as CD3, CD4, CD8 positive T cells, or regulatory T cells. Further  
6 prospective studies including immune subsets from peripheral blood and/or tumor tissue are  
7 highly desirable.

1 **Conclusion**

2 Our study first reports that IL-7 immunotherapy could restore lymphocyte count and  
3 maintain elevated TLC when administered with systemic therapy in recurrent GBM patients  
4 without serious adverse events. Combination of rhIL-7-hyFc with conventional systemic  
5 therapy such as temozolomide, bevacizumab, or PCV chemotherapy can provide opportunity  
6 of clinical benefit to the patients This outcome warrants further larger and randomized  
7 clinical trials to validate the clinical benefits of rIL-7-hyFc for GBM patients.

**Table 1. Clinical characteristics of patients with recurrent GBM**

Final molecular markers

| Patient Code | Age group | Sex | Secondary | Initial histology | Final histology | Final molecular markers |      |       |             |             |           | Leptomeningeal spread at enrollment | Time from initial diagnosis to recurrence (days) | Recurrence before rIL-17 | Treatments before rhIL7-hyFC |
|--------------|-----------|-----|-----------|-------------------|-----------------|-------------------------|------|-------|-------------|-------------|-----------|-------------------------------------|--------------------------------------------------|--------------------------|------------------------------|
|              |           |     |           |                   |                 | IDH1                    | IDH2 | 1p19q | MGMT status | TERT status | ATRX loss |                                     |                                                  |                          |                              |
| GBM1         | 36-40     | M   | Y         | DA                | GBM             | N                       | N    | N     | Y           | N           | N         | Y                                   | 1957                                             | 1                        | RT                           |
| GBM2         | 56-60     | F   | N         | GBM               | GBM             | N                       | N    | N     | Y           | UN          | N         | N                                   | 503                                              | 1                        | RT/TMZ                       |
| GBM3         | 71-75     | M   | N         | GBM               | GBM             | Y                       | UN   | N     | Y           | UN          | UN        | N                                   | 1213                                             | 1                        | RT/TMZ                       |
| GBM4         | 66-70     | F   | Y         | AO                | GBM             | N                       | N    | N     | N           | Y           | N         | N                                   | 1254                                             | 2                        | RT/TMZ, Surgery, reTMZ       |
| GBM5         | 41-45     | F   | Y         | DA                | GBM             | N                       | N    | N     | N           | U           | N         | N                                   | 553                                              | 2                        | RT, PCV                      |
| GBM6         | 51-55     | F   | N         | N                 | GBM             | N                       | N    | N     | N           | UN          | UN        | N                                   | 241                                              | 1                        | RT/TMZ                       |
| GBM7         | 21-25     | M   | N         | N                 | GBM             | N                       | N    | N     | N           | UN          | Y         | Y                                   | 921                                              | 1                        | RT/TMZ                       |
| GBM8         | 61-65     | M   | N         | N                 | GBM             | N                       | N    | N     | N           | Y           | N         | N                                   | 239                                              | 1                        | RT/TMZ                       |
| GBM9         | 66-70     | F   | Y         | AA                | GBM             | N                       | N    | N     | Y           | Y           | N         | N                                   | 132                                              | 1                        | RT, Surgery                  |
| GBM10        | 61-65     | F   | Y         | AA                | GBM             | N                       | N    | N     | Y           | Y           | N         | N                                   | 201                                              | 2                        | RT, TMZ, Surgery             |
| GBM11        | 51-55     | F   | N         | N                 | GBM             | N                       | N    | N     | Y           | N           | Y         | N                                   | 418                                              | 1                        | RT/TMZ                       |
| GBM12        | 56-60     | M   | N         | N                 | GBM             | N                       | N    | N     | N           | Y           | N         | N                                   | 595                                              | 1                        | RT/TMZ                       |
| GBM13        | 71-75     | F   | Y         | AA                | GBM             | N                       | N    | N     | N           | Y           | N         | N                                   | 379                                              | 1                        | RT/TMZ, Surgery              |
| GBM14        | 51-55     | F   | N         | N                 | GBM             | N                       | N    | N     | N           | Y           | N         | N                                   | 180                                              | 1                        | RT                           |
| GBM15        | 26-30     | M   | N         | N                 | GBM             | N                       | N    | N     | N           | UN          | N         | N                                   | 829                                              | 2                        | RT/TMZ, reRT, reTMZ          |
| GBM16        | 61-65     | F   | N         | N                 | GBM             | N                       | N    | N     | N           | Y           | N         | N                                   | 251                                              | 1                        | RT/TMZ                       |
| GBM17        | 46-50     | M   | N         | N                 | GBM             | N                       | N    | N     | N           | N           | N         | N                                   | 649                                              | 1                        | RT/TMZ                       |

|       |       |   |   |    |     |   |   |   |   |   |   |   |      |   |                            |
|-------|-------|---|---|----|-----|---|---|---|---|---|---|---|------|---|----------------------------|
| GBM18 | 31-35 | M | Y | DA | GBM | Y | N | N | N | Y | Y | N | 2687 | 2 | RT,PCV,<br>Surgery,<br>TMZ |
|-------|-------|---|---|----|-----|---|---|---|---|---|---|---|------|---|----------------------------|

AA, anaplastic astrocytoma; AO, anaplastic oligodendroglioma; DA, diffuse astrocytoma; GBM, glioblastoma; reRT, re-radiotherapy; reTMZ, re-temozolomide; RT, radiotherapy; TMZ, temozolomide. Age group

**Table 2. Details of treatment with rhIL-7-hyFc and clinical follow-up of patients with recurrent GBM**

| Patient Code | Number of shots | Dose (number of hosts)  | Treatment in addition to rhIL-7-hyFc |
|--------------|-----------------|-------------------------|--------------------------------------|
| GBM1         | 8               | *60(5), 240(2), 480(1)  | TMZ->Avastin                         |
| GBM2         | 2               | *120(2)                 | TMZ                                  |
| GBM3         | 4               | 120 (3), 240 (1)        | TMZ                                  |
| GBM4         | 3               | 120                     | None                                 |
| GBM5         | 7               | 240(10), 480(4), 720(2) | TMZ->Avastin                         |
| GBM6         | 3               | 600(2), 720(1)          | Avastin + irinotecan                 |
| GBM7         | 3               | 480(2), 720(1)          | TMZ                                  |
| GBM8         | 1               | 720                     | None                                 |
| GBM9         | 12              | 720                     | TMZ                                  |
| GBM10        | 6               | 720                     | TMZ                                  |
| GBM11        | 5               | 720                     | Avastin + irinotecan                 |
| GBM12        | 3               | 720                     | TMZ                                  |
| GBM13        | 1               | 960                     | TMZ                                  |
| GBM14        | 1               | 1,200                   | Avastin                              |
| GBM15        | 1               | 1,200                   | PCV                                  |
| GBM16        | 1               | 1,440                   | Avastin                              |
| GBM17        | 3               | 1,200                   | TMZ                                  |
| GBM18        | 1               | 1,200                   | Avastin                              |

\* *Injected every 4 week*



1 **Table 3. Adverse events to treatment with rhIL-7-hyFc.**

| Adverse events                                                   | Number of adverse events |               |
|------------------------------------------------------------------|--------------------------|---------------|
|                                                                  | ( $\geq$ Grade III)      |               |
| Urticaria, redness, and itching sensation at near injection site | 44 (1)                   | 64.7% (1.47%) |
| Edema near injection site                                        | 9 (0)                    | 13.2%         |
| Fatigue                                                          | 2 (0)                    | 2.94%         |
| Febrile sensation                                                | 2 (0)                    | 2.94%         |

2

3

4

**Supplementary Table 1. Baseline characteristics of historical patients with recurrent GBM in our institution.**

| n (%)                      | N =123     |
|----------------------------|------------|
| <b>Sex</b>                 |            |
| Female                     | 55 (44.7)  |
| Male                       | 68 (55.3)  |
| <b>Mean age (years)</b>    |            |
| > 65 years                 | 49 (39.8)  |
| <b>Extent of resection</b> |            |
| Gross total resection      | 42 (34.1)  |
| Subtotal resection         | 36 (29.3)  |
| Partial resection          | 23 (18.7)  |
| Biopsy                     | 22 (17.9)  |
| <b>IDH mutation</b>        |            |
| Yes                        | 2 (1.6)    |
| No                         | 64 (52.0)  |
| Unknown                    | 57 (46.3)  |
| <b>1p19q co-deletion</b>   |            |
| Yes                        | 2 (1.6)    |
| No                         | 100 (81.3) |

| n (%)                                           | N =123    |
|-------------------------------------------------|-----------|
| Unknown                                         | 21 (17.1) |
| MGMT methylation                                |           |
| Yes                                             | 47 (38.2) |
| No                                              | 52 (42.3) |
| Unknown                                         | 24 (19.5) |
| Completion of CCRT<br>and adjuvant chemotherapy |           |
| Yes                                             | 60 (48.8) |
| No                                              | 63 (51.2) |

1

**1 Supplementary Table 2. Changes of total lymphocyte counts following treatments.**

| Patient Code | Cycle | Dose, $\mu\text{g}/\text{kg}$ | WBC (lymphocyte %) at minimum | TLC at minimum | WBC (lymphocyte %) at maximum | TLC at maximum | Fold change |
|--------------|-------|-------------------------------|-------------------------------|----------------|-------------------------------|----------------|-------------|
| GBM1         | 1*    | 60                            | 7260 (13.6%)                  | 987            | 7680 (21.2)                   | 1,628          | 1.65        |
|              | 2*    | 60                            | 6030 (22.9)                   | 1381           | 5720 (29.0)                   | 1659           | 1.20        |
|              | 3*    | 60                            | 5710 (27.8)                   | 1587           | 4670 (29.3)                   | 1368           | 0.86        |
|              | 4*    | 60                            | 5090 (26.5)                   | 1349           | 5010 (34.3)                   | 1718           | 1.27        |
|              | 5*    | 60                            | 4200 (22.1)                   | 928            | 4150 (24.1)                   | 1000           | 1.08        |
|              | 6     | 240                           | 4840 (25.4)                   | 1229           | 6800 (19.1)                   | 1299           | 1.00        |
|              | 7     | 480                           | 7770 (12.6)                   | 979            | 9730 (16.2)                   | 1576           | 1.61        |
|              | 8     | 240                           | 6250 (20.2)                   | 1263           | 5450 (22.9)                   | 1248           | 0.99        |
|              | 9     | 600                           | 3180 (27.5)                   | 875            | 18900 (9.8)                   | 1852           | 2.12        |
| GBM2         | 1*    | 120                           | 4240 (15.3)                   | 649            | 7920 (14.4)                   | 1140           | 1.76        |
|              | 2*    | 120                           | 4880 (13.7)                   | 669            | 5030 (6.8)                    | 342            | 0.51        |
| GBM3         | 1     | 120                           | 5290 (24.0)                   | 1270           | 5520 (43.8)                   | 2418           | 1.90        |
|              | 2     | 120                           | 4410 (33.3)                   | 1469           | 6250 (35.5)                   | 2219           | 1.51        |
|              | 3     | 120                           | 7030 (13.5)                   | 949            | 5320 (22.0)                   | 1170           | 1.23        |
|              | 4     | 240                           | 4740 (18.1)                   | 858            | 4520 (25.2)                   | 1139           | 1.33        |
| GBM4         | 1     | 120                           | 3640 (19.2)                   | 699            | 4640 (35.7)                   | 1592           | 2.28        |
|              | 2     | 120                           | 4450 (36.6)                   | 1692           | N/A                           | N/A            | N/A         |
|              | 3     | 120                           | 8320 (37.3)                   | 3103           | N/A                           | N/A            | N/A         |
| GBM5         | 1     | 240                           | 8550 (11.4)                   | 975            | 9730 (19.5)                   | 1897           | 1.95        |
|              | 2     | 480                           | 4880 (19.6)                   | 941            | 3510 (55.5)                   | 1948           | 2.07        |
|              | 3     | 480                           | 2610 (37.9)                   | 989            | 1600 (49.4)                   | 790            | 0.80        |
|              | 4     | 480                           | 2240 (40.2)                   | 900            | 5410 (27.0)                   | 1461           | 1.62        |
|              | 5     | 480                           | 5410 (22.5)                   | 1217           | 5750 (26.6)                   | 1530           | 1.26        |
|              | 6     | 720                           | 8000 (16.9)                   | 1352           | 6080 (24.5)                   | 1490           | 1.10        |
|              | 7     | 720                           | 3560 (20.5)                   | 730            | N/A                           | N/A            | N/A         |
| GBM6         | 1     | 600                           | 2590 (20.1)                   | 521            | 4670 (59.1)                   | 2760           | 5.30        |
|              | 2     | 600                           | 8770 (23.5)                   | 2061           | 9770 (60.3)                   | 5891           | 2.86        |
|              | 3     | 600                           | 8120 (47.8)                   | 3881           | 11870 (43.5)                  | 5163           | 1.33        |
| GBM7         | 1     | 480                           | 2000 (16.5)                   | 330            | 2790 (23.7)                   | 661            | 2.00        |
|              | 2     | 480                           | 4980 (26.3)                   | 1310           | 1130 (39.8)                   | 450            | 0.34        |
|              | 3     | 720                           | 2470 (8.9)                    | 220            | 1900 (13.8)                   | 400            | 1.82        |
| GBM8         | 1     | 720                           | 4990 (25.5)                   | 1272           | 11530 (31.5)                  | 3632           | 2.85        |
| GBM9         | 1     | 720                           | 4690 (34.8)                   | 1632           | 12310 (55.6)                  | 6844           | 4.19        |
|              | 2     | 720                           | 6900 (47.4)                   | 3271           | 11860 (53.0)                  | 6286           | 1.92        |
|              | 3     | 720                           | 7810 (44.0)                   | 3436           | 11140 (51.0)                  | 5681           | 1.65        |
|              | 4     | 720                           | 8120 (40.6)                   | 3297           | 9730 (45.1)                   | 4388           | 1.33        |
|              | 5     | 720                           | 7180 (27.7)                   | 1989           | 7900 (32.7)                   | 2583           | 1.30        |
|              | 6     | 720                           | 5420 (33.4)                   | 1810           | 5650 (37.9)                   | 2141           | 1.18        |
|              | 7     | 720                           | 4640 (30.6)                   | 1420           | 5800 (32.7)                   | 1897           | 1.34        |
|              | 8     | 720                           | 4860 (24.1)                   | 1171           | 5200 (26.8)                   | 1394           | 1.19        |
|              | 9     | 720                           | 3140 (30.9)                   | 970            | 6480 (21.1)                   | 1367           | 1.41        |
|              | 10    | 720                           | 4660 (23.6)                   | 1100           | 3590 (30.6)                   | 1099           | 1.00        |
|              | 11    | 720                           | 3710 (22.1)                   | 820            | N/A                           | N/A            | N/A         |
|              | 12    | 720                           | 4010 (20.0)                   | 802            | N/A                           | N/A            | N/A         |
| GBM10        | 1     | 720                           | 8490 (28.2)                   | 2394           | 9340 (44.8)                   | 4184           | 1.75        |
|              | 2     | 720                           | 9170 (20.7)                   | 1898           | 4900 (48.4)                   | 2372           | 1.25        |

It is made available under a [CC-BY-NC-ND 4.0 International license](https://creativecommons.org/licenses/by-nc-nd/4.0/) .

|       |   |       |             |      |              |       |      |
|-------|---|-------|-------------|------|--------------|-------|------|
|       | 3 | 720   | 7160 (41.8) | 2993 | 5320 (38.3)  | 2038  | 0.68 |
|       | 4 | 720   | 6260 (10.2) | 639  | 3390 (33.6)  | 1139  | 1.78 |
|       | 5 | 720   | 6650 (10.2) | 678  | 4590 (19.8)  | 909   | 1.34 |
|       | 6 | 720   | 5430 (11.6) | 630  | 13660 (5.4)  | 738   | 1.17 |
| GBM11 | 1 | 720   | 1850 (46.5) | 860  | 7140 (70.3)  | 5019  | 5.83 |
|       | 2 | 720   | 3510 (66.1) | 2320 | 7320 (68.4)  | 5007  | 2.16 |
|       | 3 | 720   | 3690 (59.9) | 2210 | 5240 (59.2)  | 3102  | 1.40 |
|       | 4 | 720   | 4170 (54.9) | 2289 | 8820 (54.6)  | 4816  | 2.10 |
|       | 5 | 720   | 7660 (52.0) | 3983 | 8120 (53.6)  | 4352  | 1.09 |
|       | 6 | 720   | 4100 (50.5) | 2071 | 3840 (42.4)  | 1628  | 0.79 |
| GBM12 | 1 | 720   | 5920 (27.5) | 1628 | 13260 (54.5) | 7227  | 4.44 |
|       | 2 | 720   | 7850 (52.7) | 4137 | 12740 (49.1) | 6255  | 1.51 |
|       | 3 | 720   | 6920 (39.3) | 2720 | 7000 (56.0)  | 3920  | 1.44 |
|       | 4 | 720   | 8410 (44.6) | 3751 | 11790 (53.1) | 6260  | 1.67 |
| GBM13 | 1 | 720   | 4230 (16.3) | 689  | 12550 (16.8) | 2108  | 3.06 |
| GBM14 | 1 | 1,200 | 8130 (7.1)  | 577  | 7600 (13.2)  | 1003  | 1.74 |
| GBM15 | 1 | 1,200 | 8250 (12.2) | 1007 | 18800 (48.9) | 9193  | 9.13 |
| GBM16 | 1 | 1,440 | 6230 (22.3) | 1389 | 7830 (48.1)  | 3766  | 2.71 |
| GBM17 | 1 | 1,200 | 2530 (19.4) | 491  | 2830 (24.0)  | 679   | 1.38 |
|       | 2 | 1200  | 3380 (16.9) | 571  | 2880 (22.9)  | 660   | 1.15 |
|       | 3 | 1200  | 3120 (16.7) | 521  | 2880 (20.5)  | 590   | 1.13 |
| GBM18 | 1 | 1200  | 5860 (51.0) | 2989 | 26850 (84.4) | 22661 | 7.58 |

1 \* *Injected every 4 weeks*

1 **Figure legends**

2 Figure 1. Swimmer plot of the clinical course of patients after enrollment.

3 Figure 2. Changes of total lymphocyte counts following treatment with rhIL-7-hyFc.

4 Figure 3. Kaplan-Meier survival curve for overall survival comparing the treatment group  
5 with the historical group.

6 Figure 4. Representative clinical images of patients who showed partial response (GBM7 and  
7 GBM11) or longer stable state (GBM9) after injection of rhIL-7-hyFc.

8 Supplementary Figure. Kaplan-Meier survival curve for (a) overall survival and (b)  
9 progression-free survival of treatment group.

1

## References

- 2 1. Ostrom QT, Cioffi G, Waite K, Kruchko C, Barnholtz-Sloan JS. CBTRUS Statistical  
3 Report: Primary Brain and Other Central Nervous System Tumors Diagnosed in the  
4 United States in 2014–2018. *Neuro-oncology*. 2021;23(Supplement\_3):iii1-iii105.
- 5 2. Stupp R, Taillibert S, Kanner A, et al. Effect of tumor-treating fields plus  
6 maintenance temozolomide vs maintenance temozolomide alone on survival in  
7 patients with glioblastoma: a randomized clinical trial. *Jama*. 2017;318(23):2306-  
8 2316.
- 9 3. Wick W, Gorlia T, Bendszus M, et al. Lomustine and bevacizumab in progressive  
10 glioblastoma. *New England Journal of Medicine*. 2017;377(20):1954-1963.
- 11 4. Wen PY, Weller M, Lee EQ, et al. Glioblastoma in adults: a Society for Neuro-  
12 Oncology (SNO) and European Society of Neuro-Oncology (EANO) consensus  
13 review on current management and future directions. *Neuro-oncology*.  
14 2020;22(8):1073-1113.
- 15 5. Koukourakis MI, Giatromanolaki A. Lymphopenia and intratumoral lymphocytic  
16 balance in the era of cancer Immuno-Radiotherapy. *Critical Reviews in*  
17 *Oncology/Hematology*. 2021:103226.
- 18 6. Ahn S, Park J-S, Jang J, et al. The association between total lymphocyte count after  
19 concomitant chemoradiation and overall survival in patients with newly diagnosed  
20 glioblastoma. *Journal of Clinical Neuroscience*. 2020;71:21-25.
- 21 7. Byun HK, Kim N, Yoon HI, et al. Clinical predictors of radiation-induced  
22 lymphopenia in patients receiving chemoradiation for glioblastoma: clinical  
23 usefulness of intensity-modulated radiotherapy in the immuno-oncology era.  
24 *Radiation Oncology*. 2019;14(1):1-10.
- 25 8. Kim WJ, Dho Y-S, Ock C-Y, et al. Clinical observation of lymphopenia in patients  
26 with newly diagnosed glioblastoma. *Journal of neuro-oncology*. 2019;143(2):321-  
27 328.
- 28 9. Byun HK, Chung SY, Kim K-J, Seong J. Role of Interleukin-7 in the Development of  
29 and Recovery from Radiation-Induced Lymphopenia: A Post-hoc Analysis of a  
30 Prospective Cohort. *Cancer Research and Treatment: Official Journal of Korean*  
31 *Cancer Association*. 2021;53(4):962.
- 32 10. Ménétrier-Caux C, Ray-Coquard I, Blay J-Y, Caux C. Lymphopenia in Cancer  
33 Patients and its Effects on Response to Immunotherapy: an opportunity for  
34 combination with Cytokines? *Journal for immunotherapy of cancer*. 2019;7(1):1-15.
- 35 11. Velardi E, Tsai JJ, van den Brink MR. T cell regeneration after immunological injury.  
36 *Nature Reviews Immunology*. 2021;21(5):277-291.
- 37 12. Jacobs SR, Michalek RD, Rathmell JC. IL-7 is essential for homeostatic control of T  
38 cell metabolism in vivo. *The Journal of Immunology*. 2010;184(7):3461-3469.
- 39 13. Mackall CL, Fry TJ, Gress RE. Harnessing the biology of IL-7 for therapeutic  
40 application. *Nature Reviews Immunology*. 2011;11(5):330-342.
- 41 14. Tredan O, Ménétrier-Caux C, Ray-Coquard I, et al. ELYPSE-7: a randomized  
42 placebo-controlled phase IIa trial with CYT107 exploring the restoration of CD4+  
43 lymphocyte count in lymphopenic metastatic breast cancer patients. *Annals of*  
44 *Oncology*. 2015;26(7):1353-1362.
- 45 15. Rosenberg SA, Sportès C, Ahmadzadeh M, et al. IL-7 administration to humans leads  
46 to expansion of CD8+ and CD4+ cells but a relative decrease of CD4+ T-regulatory  
47 cells. *Journal of immunotherapy (Hagerstown, Md: 1997)*. 2006;29(3):313.

- 1 16. Sportès C, Babb RR, Krumlauf MC, et al. Phase I study of recombinant human  
2 interleukin-7 administration in subjects with refractory malignancy. *Clinical Cancer*  
3 *Research*. 2010;16(2):727-735.
- 4 17. Merchant MS, Bernstein D, Amoako M, et al. Adjuvant immunotherapy to improve  
5 outcome in high-risk pediatric sarcomas. *Clinical Cancer Research*.  
6 2016;22(13):3182-3191.
- 7 18. Lee SW, Choi D, Heo M, et al. hIL-7-hyFc, a long-acting IL-7, increased absolute  
8 lymphocyte count in healthy subjects. *Clinical and translational science*.  
9 2020;13(6):1161-1169.
- 10 19. Grassberger C, Ellsworth SG, Wilks MQ, Keane FK, Loeffler JS. Assessing the  
11 interactions between radiotherapy and antitumour immunity. *Nature reviews Clinical*  
12 *oncology*. 2019;16(12):729-745.
- 13 20. Gao J, Zhao L, Wan YY, Zhu B. Mechanism of action of IL-7 and its potential  
14 applications and limitations in cancer immunotherapy. *International journal of*  
15 *molecular sciences*. 2015;16(5):10267-10280.
- 16 21. ElKassar N, Gress RE. An overview of IL-7 biology and its use in immunotherapy.  
17 *Journal of immunotoxicology*. 2010;7(1):1-7.
- 18 22. Pellegrini M, Calzascia T, Elford AR, et al. Adjuvant IL-7 antagonizes multiple  
19 cellular and molecular inhibitory networks to enhance immunotherapies. *Nature*  
20 *medicine*. 2009;15(5):528-536.
- 21 23. Han F, Hu R, Su M, Yu Y, Yang H, Lai L. A human recombinant IL-7/HGF $\beta$  hybrid  
22 cytokine enhances antitumor immunity in mice. *American journal of cancer research*.  
23 2017;7(8):1714.
- 24 24. Choi YW, Kang MC, Seo YB, et al. Intravaginal administration of Fc-fused IL7  
25 suppresses the cervicovaginal tumor by recruiting HPV DNA vaccine-induced CD8 T  
26 cells. *Clinical Cancer Research*. 2016;22(23):5898-5908.
- 27 25. Li B, VanRoey MJ, Jooss K. Recombinant IL-7 enhances the potency of GM-CSF-  
28 secreting tumor cell immunotherapy. *Clinical Immunology*. 2007;123(2):155-165.
- 29 26. Reardon DA, Brandes AA, Omuro A, et al. Effect of nivolumab vs bevacizumab in  
30 patients with recurrent glioblastoma: the CheckMate 143 phase 3 randomized clinical  
31 trial. *JAMA oncology*. 2020;6(7):1003-1010.

# Figure Legends

- **Figure 1. Swimmer plot of clinical course of patients after enrollment.**
- **Figure 2. Changes of total lymphocyte counts following treatments of rhIL-7-hyFc.**
- **Figure 3. Kaplan-Meier survival curve for overall survival comparing the treatment group with the historical group**
- **Figure 4. Representative clinical images of patients who showed partial responses or longer stable diseases after injection of rhIL-7-hyFc.**



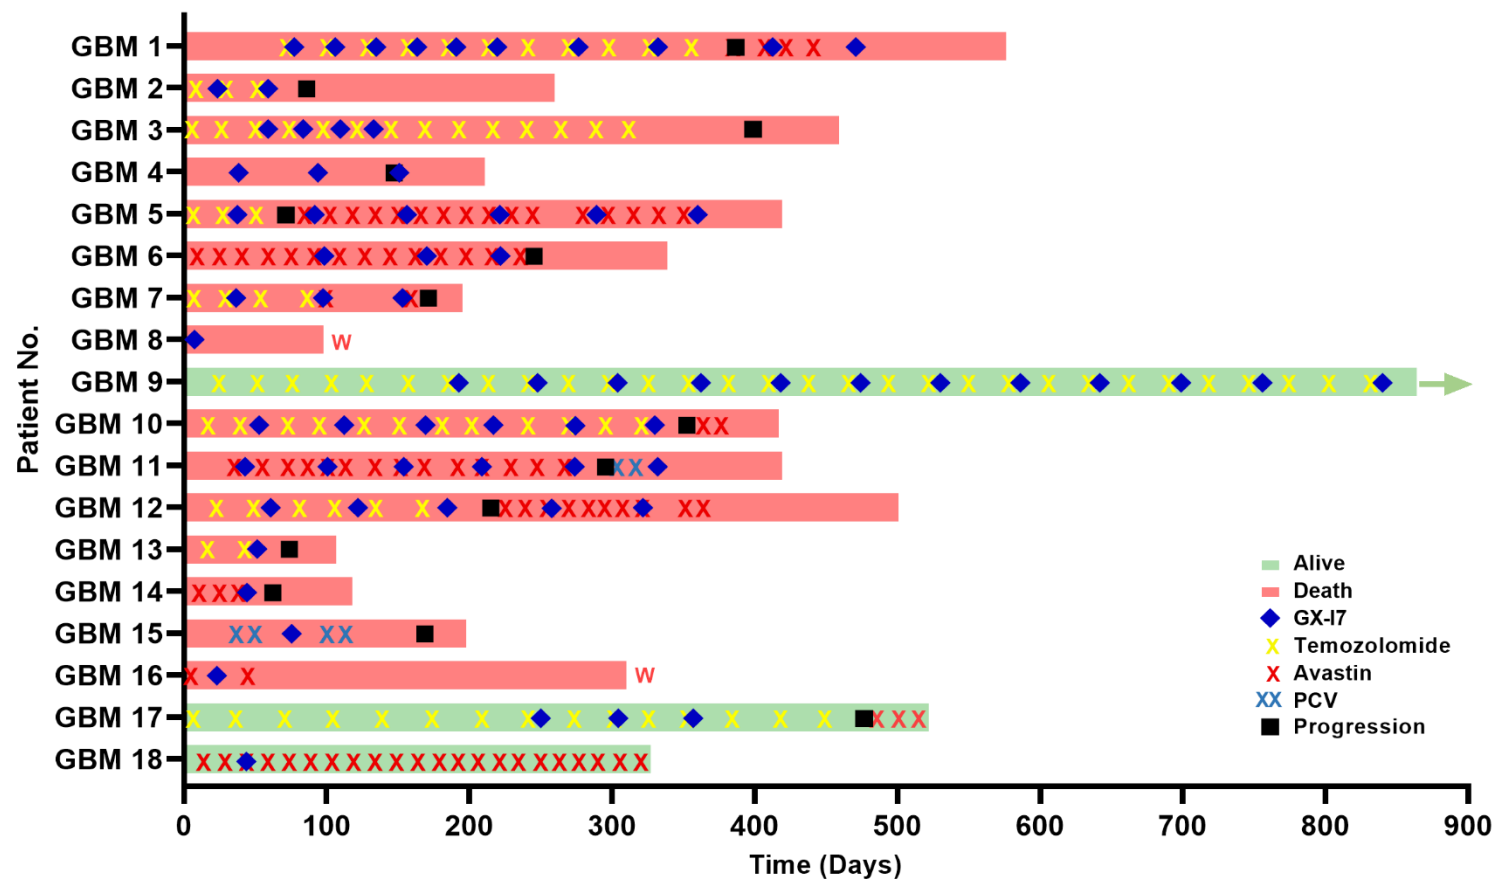

**Figure 1. Swimmer plot of clinical course of patients after enrollment.** A total of 18 patients were assessed in this program. Each bar represents an individual patient’s treatment history with subsequent treatment and the bar color indicating survival status. These included the following: rhIL-7-hyFc with temozolomide, n = 10; rhIL-7-hyFc with bevacizumab, n = 5; rhIL-7-hyFc with PCV chemotherapy, n = 1; rhIL-7-hyFc alone, n = 2).

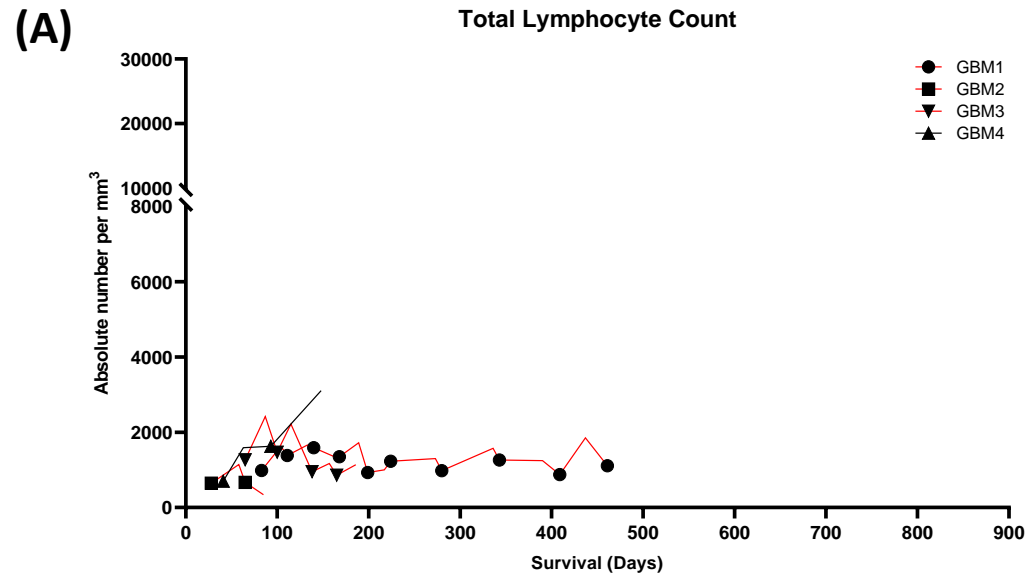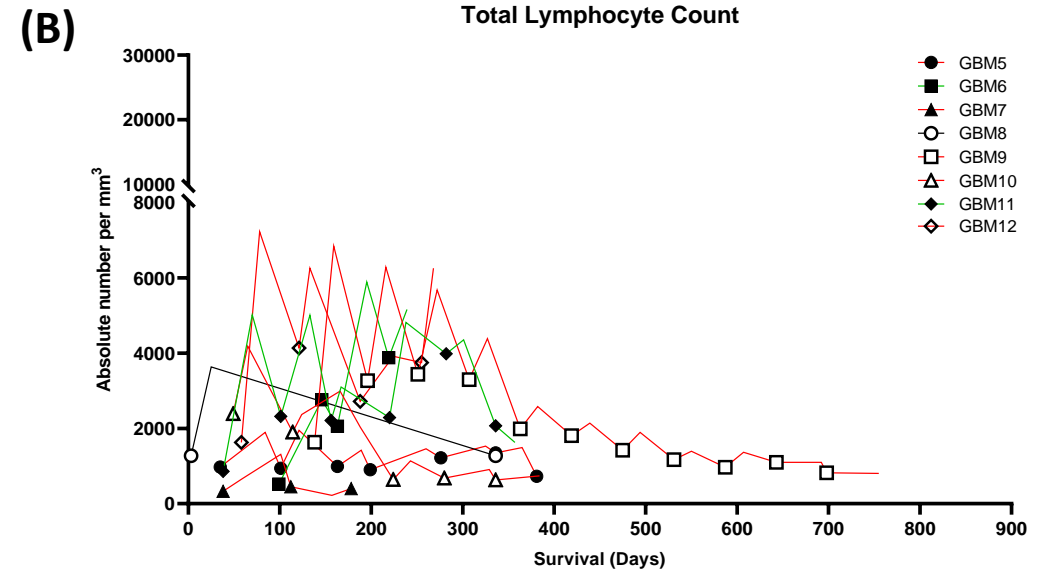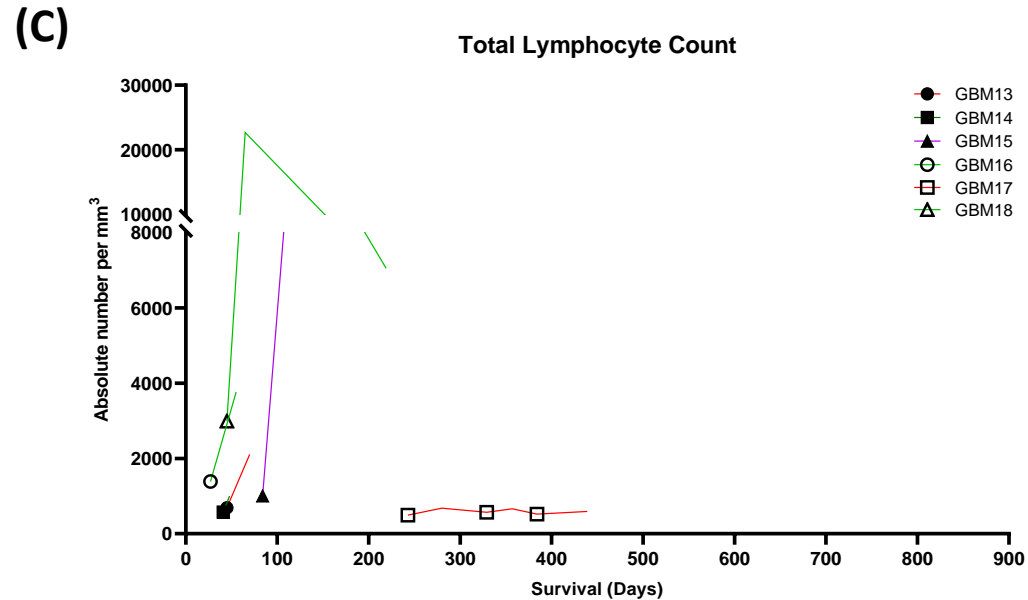

**Figure 2.** Changes of total lymphocyte counts following treatments of rhIL-7-fyFc. Patients were treated with 120~240 ug/kg rhIL-7-hyFc (A), 480~720 ug/kg rhIL-7-hyFc (B) and 960~1440 ug/kg rhIL-7-hyFc (C). Symbol; rhIL-7-hyFc administration, Red line; TMZ treatment in addition to rhIL-7-hyFc, Green line; Avastin or Avastin+irinotecan treatment in addition to rhIL-7-hyFc, Purple line; PCV treatment in addition to rhIL-7-hyFc.

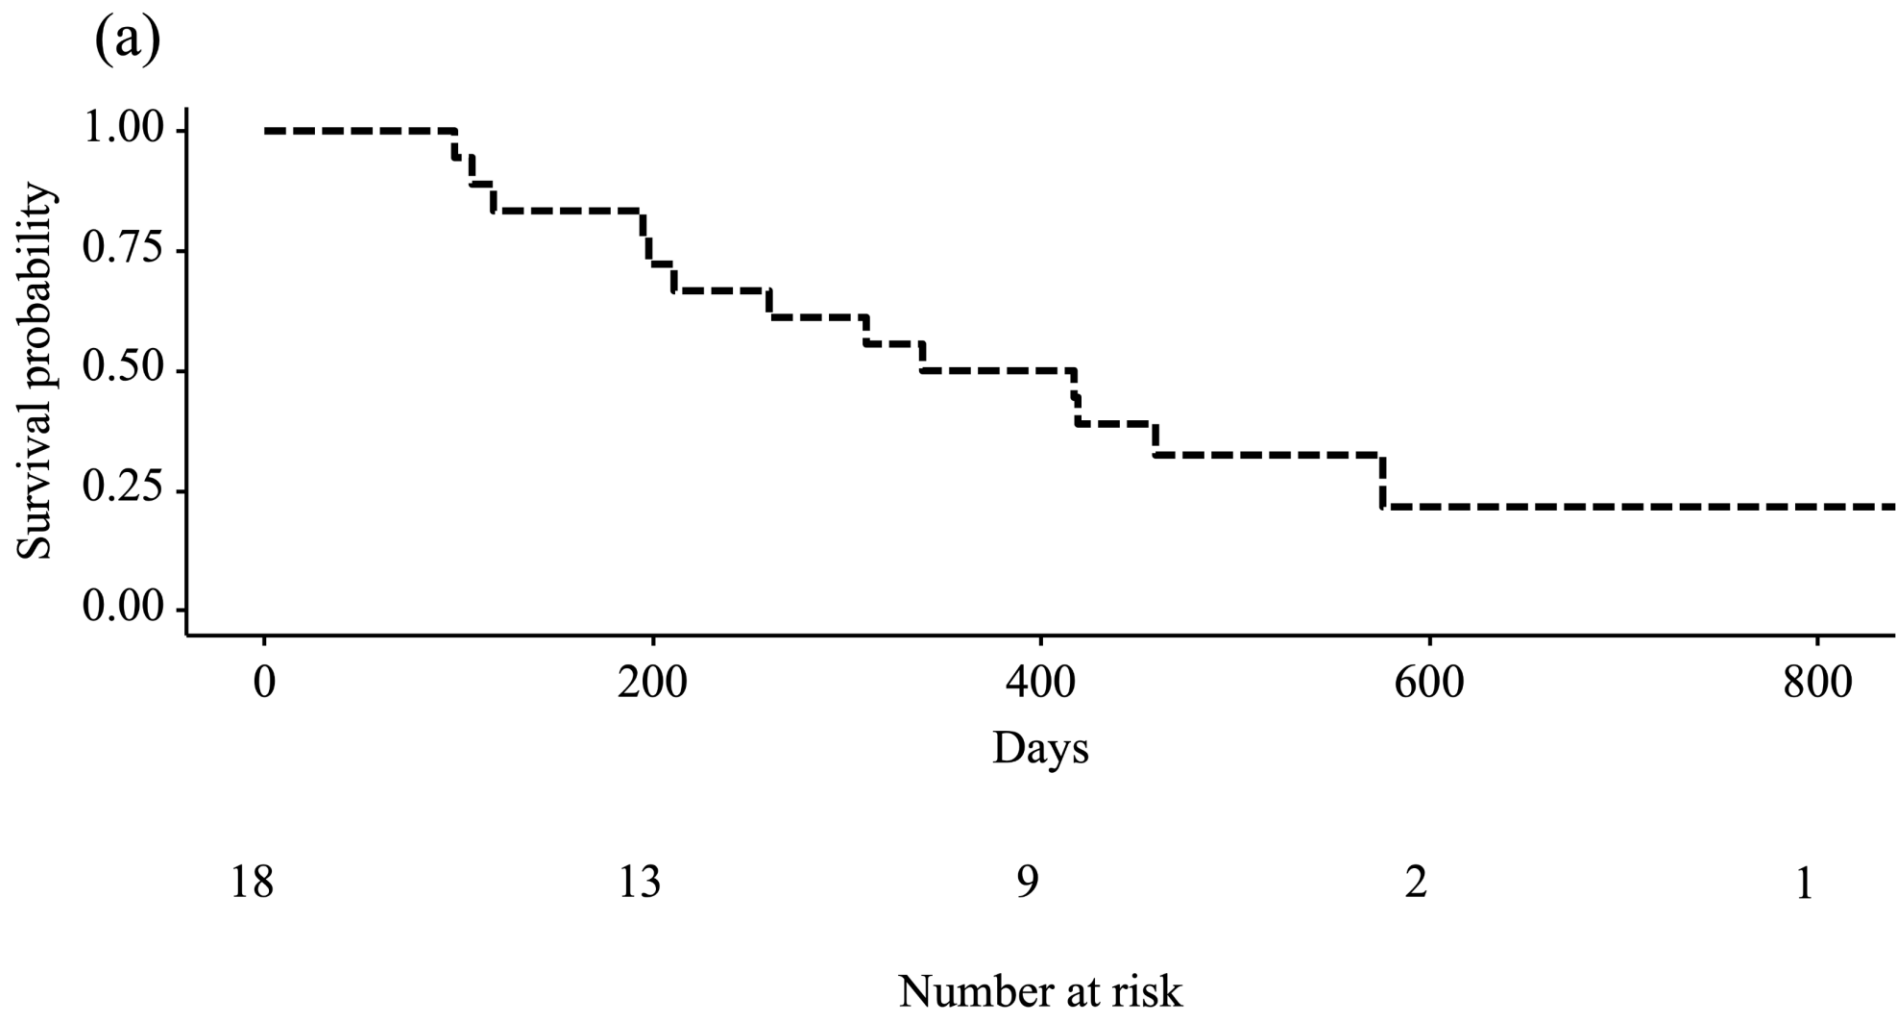

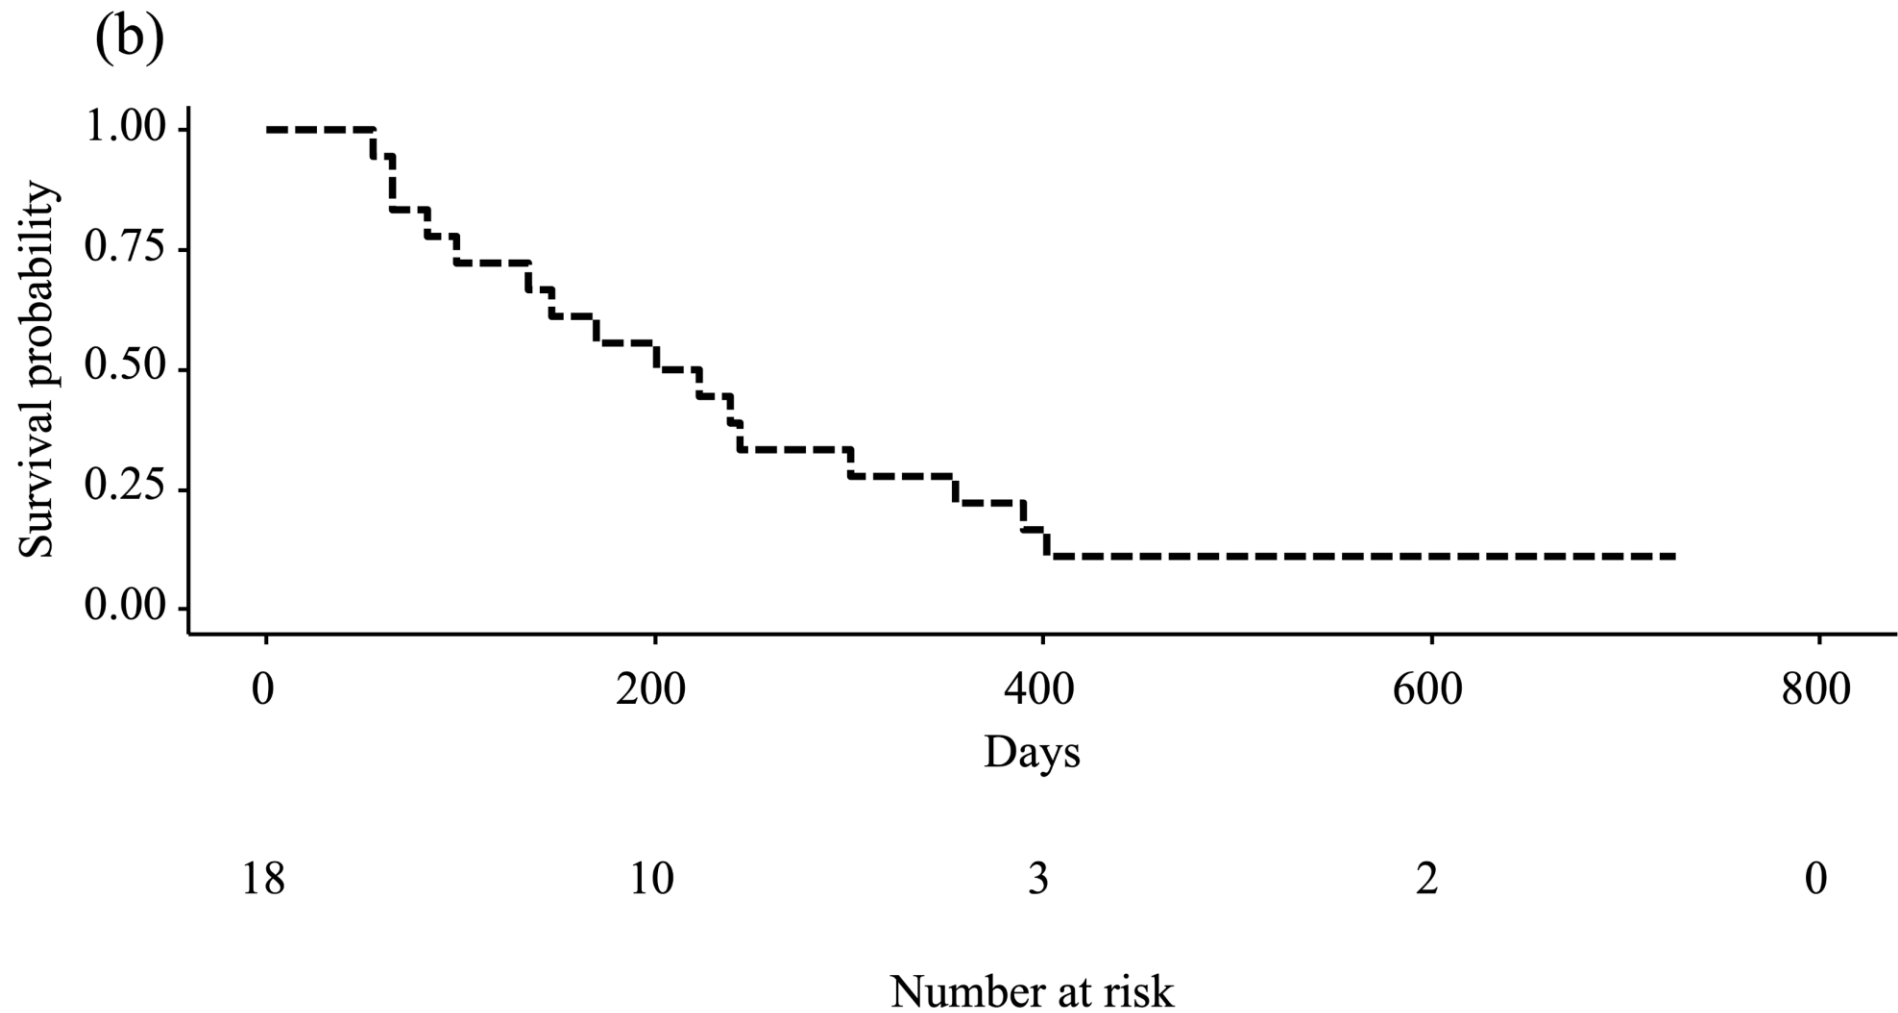

**Figure 3.** Kaplan-Meier survival curve for overall survival (a) and progression-free survival (b) of enrolled patients.

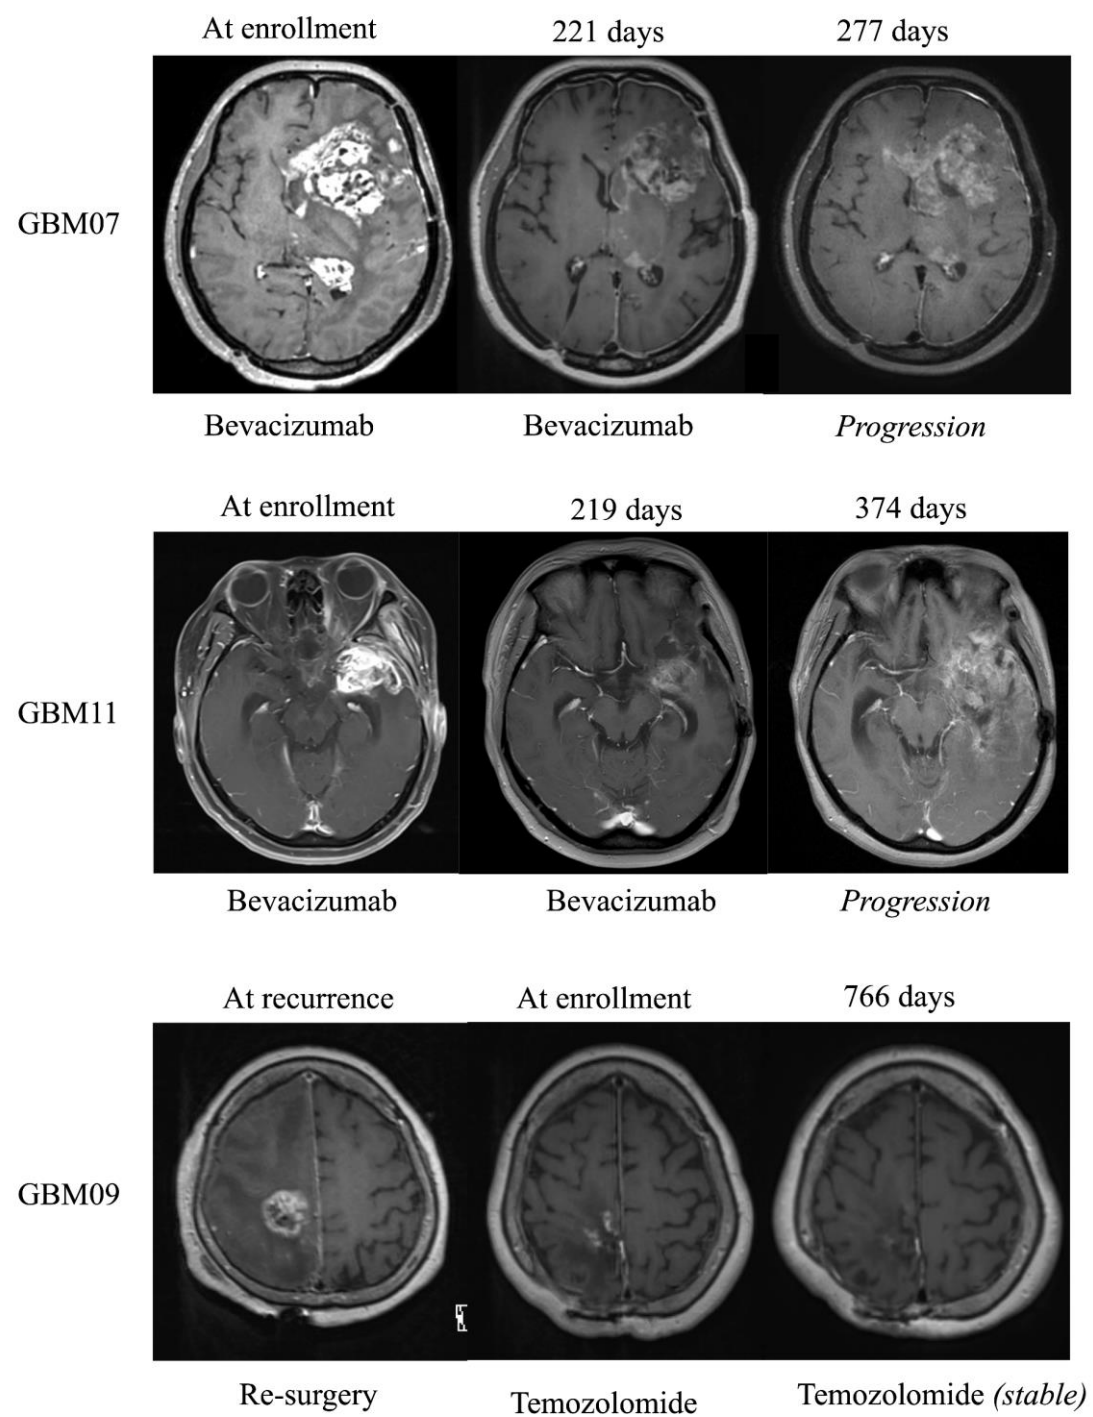

**Figure 4.** Representative clinical images of patients who showed partial responses or longer stable diseases after injection of rhIL-7-hyFc.

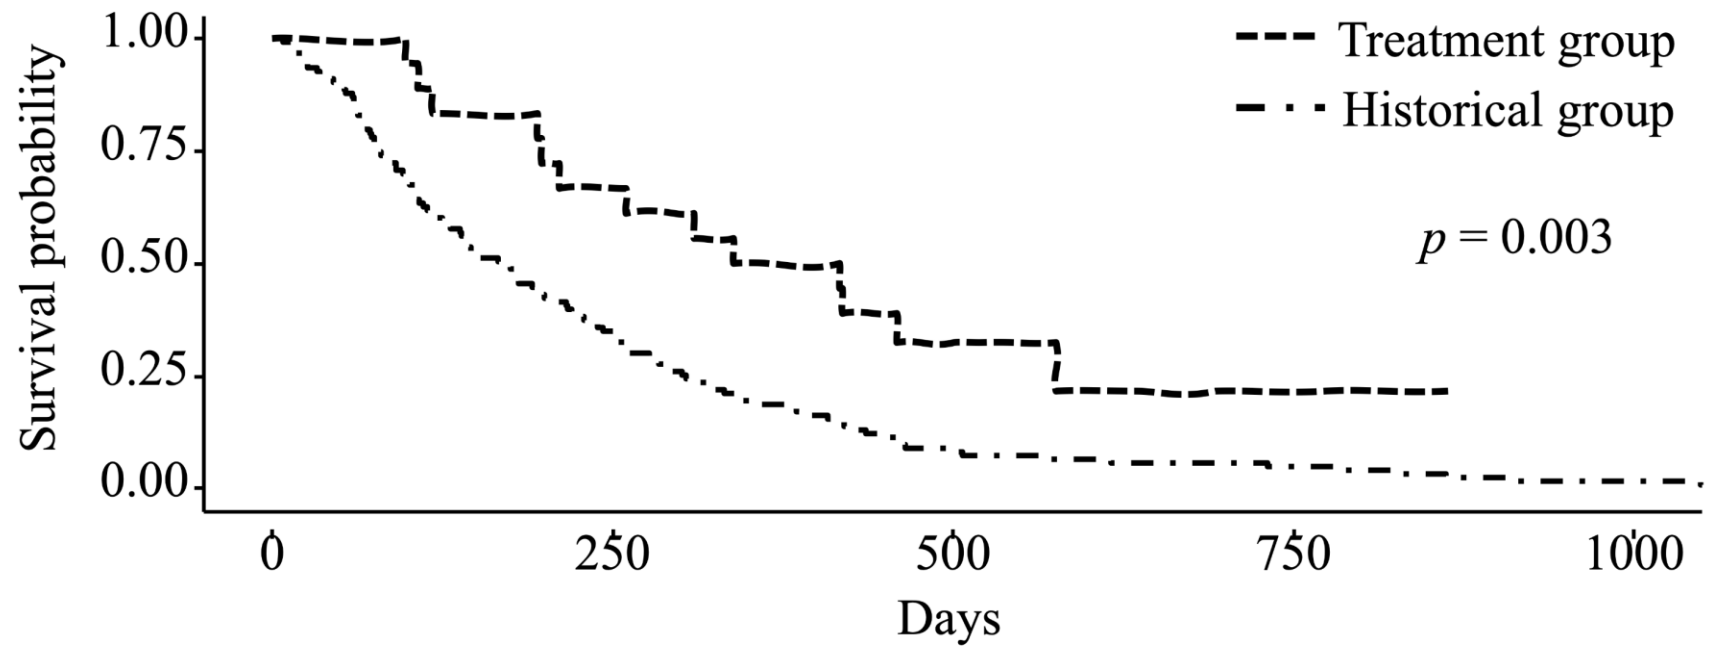

|                  |     |    |    |   |   |
|------------------|-----|----|----|---|---|
| Historical group | 123 | 43 | 10 | 6 | 2 |
| Treatment group  | 18  | 12 | 5  | 1 | 0 |

Numbers at risk

**Figure Suppl.** Kaplan-Meier survival curve for overall survival comparing the treatment group with the historical group. The P-value is derived by log-rank test.
